# Supplementary material for: CRISPR-based editing strategies to rectify EYA1 complex genomic rearrangement linked to haploinsufficiency
Source: bioRxiv or medRxiv preprint supplement (doi:10.1101/2023.11.14.23298277), 2023-11-15
Supplement: Supplementary file [file media-1.pdf]

## Supplementary Materials for

### CRISPR-based editing strategies to rectify *EYA1* complex genomic rearrangement linked to haploinsufficiency

Yi Hwalin, Yejin Yun, Won Hoon Choi, Hye-Yeon Hwang, Ju Hyuen Cha, Heeyoung Seok, Jae-Jin Song, Jun Ho Lee, Seung Ha Oh, Sang-Yeon Lee\*, Daesik Kim\*

Correspondence to: [dskim89@skku.edu](mailto:dskim89@skku.edu) (Daesik Kim), [maru4843@hanmail.net](mailto:maru4843@hanmail.net) (Sang-Yeon Lee)

This PDF file includes:

Supplementary Figures 1-3

Supplementary Tables 1-5

Supplementary Figure 1. Normal *EYA1* copy number state identified through MLPA.

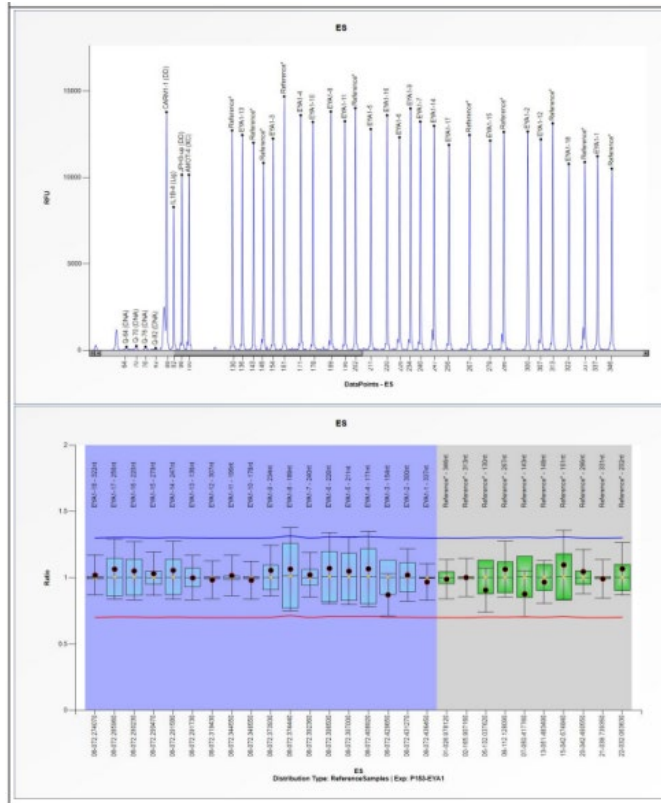

| D [nt]                                | Gene-Exon  | Chr.band | hg18 loc.     | Height       | Area          | Ratio <sup>#</sup> | Stdev       | [REF] | Width     | d[nt]       | [Mut details] |
|---------------------------------------|------------|----------|---------------|--------------|---------------|--------------------|-------------|-------|-----------|-------------|---------------|
| 322                                   | EYA1-18    | 08q13.3  | 08-072.274070 | 10785        | 96529         | 1.02               | 0.08        | =     | 59        | 0.0         | -             |
| 256                                   | EYA1-17    | 08q13.3  | 08-072.285960 | 11885        | 96619         | 1.06               | <b>0.11</b> | =     | 55        | 0.0         | -             |
| 220                                   | EYA1-16    | 08q13.3  | 08-072.290230 | 13600        | 104863        | 1.05               | <b>0.11</b> | =     | 52        | 0.1         | -             |
| 279                                   | EYA1-15    | 08q13.3  | 08-072.290470 | 12134        | 102378        | 1.03               | 0.08        | =     | 60        | 0.1         | -             |
| 247                                   | EYA1-14    | 08q13.3  | 08-072.291580 | 12985        | <b>100330</b> | 1.06               | <b>0.11</b> | =     | 29        | 0.0         | -             |
| 136                                   | EYA1-13    | 08q13.3  | 08-072.291730 | 12457        | 91836         | 1                  | 0.08        | =     | 68        | 0.0         | -             |
| 307                                   | EYA1-12    | 08q13.3  | 08-072.319430 | 12210        | 107088        | 0.98               | 0.07        | =     | 69        | 0.1         | -             |
| 196                                   | EYA1-11    | 08q13.3  | 08-072.344550 | 13254        | <b>95780</b>  | 1.02               | 0.08        | =     | 30        | 0.1         | -             |
| 178                                   | EYA1-10    | 08q13.3  | 08-072.346550 | 13211        | 97845         | 0.98               | 0.07        | =     | 71        | 0.0         | -             |
| 234                                   | EYA1-9     | 08q13.3  | 08-072.373930 | 13998        | 114731        | 1.06               | 0.1         | =     | 66        | 0.0         | -             |
| 189                                   | EYA1-8     | 08q13.3  | 08-072.374440 | 13820        | 105034        | 1.07               | <b>0.16</b> | =     | 51        | 0.0         | -             |
| 240                                   | EYA1-7     | 08q13.3  | 08-072.392360 | 13232        | 106704        | 1.02               | 0.08        | =     | 57        | 0.0         | -             |
| 226                                   | EYA1-6     | 08q13.3  | 08-072.396500 | 12327        | <b>94592</b>  | 1.07               | <b>0.13</b> | =     | 37        | 0.0         | -             |
| 211                                   | EYA1-5     | 08q13.3  | 08-072.397000 | 12804        | 97041         | 1.05               | <b>0.13</b> | =     | 43        | 0.0         | -             |
| 171                                   | EYA1-4     | 08q13.3  | 08-072.408920 | 13605        | 100138        | 1.07               | <b>0.14</b> | =     | 45        | 0.0         | -             |
| 154                                   | EYA1-3     | 08q13.3  | 08-072.429650 | 12252        | 91316         | 0.87               | 0.08        | =     | 63        | 0.0         | -             |
| 300                                   | EYA1-2     | 08q13.3  | 08-072.431270 | 12657        | 108309        | 1.02               | 0.1         | =     | 55        | 0.1         | -             |
| 337                                   | EYA1-1     | 08q13.3  | 08-072.436450 | 11227        | 104399        | 0.97               | 0.07        | =     | 73        | 0.1         | -             |
| 346                                   | Reference* | 01p36.11 | 01-026.978120 | 10515        | 99392         | 0.99               | 0.07        | =     | 80        | 0.0         | -             |
| 313                                   | Reference* | 02q24.3  | 02-166.907160 | 13136        | 115651        | 1                  | 0.07        | =     | 57        | 0.1         | -             |
| 130                                   | Reference* | 05q31.1  | 05-132.037620 | 12724        | 92526         | 0.97               | 0.08        | =     | 67        | 0.1         | -             |
| 267                                   | Reference* | 06q21    | 06-112.128090 | 12463        | 104080        | 1.06               | 0.1         | =     | 62        | 0.0         | -             |
| 143                                   | Reference* | 07p12.2  | 07-050.417760 | 12011        | 89911         | 0.88               | 0.09        | =     | 70        | 0.0         | -             |
| 148                                   | Reference* | 13q14.3  | 13-051.483490 | 10847        | 84259         | 0.97               | 0.08        | =     | 57        | 0.1         | -             |
| 161                                   | Reference* | 15q15.3  | 15-042.674840 | 14695        | 105744        | 1.1                | <b>0.13</b> | =     | 59        | 0.0         | -             |
| 286                                   | Reference* | 20q13.12 | 20-042.490550 | 12634        | <b>103695</b> | 1.05               | 0.08        | =     | 34        | 0.1         | -             |
| 331                                   | Reference* | 21q22.2  | 21-038.739350 | 10891        | <b>94758</b>  | 0.99               | 0.07        | =     | 29        | 0.1         | -             |
| 202                                   | Reference* | 22q12.3  | 22-032.063630 | 14016        | 105860        | 1.07               | 0.1         | =     | 46        | 0.0         | -             |
| <b>Median value all probe values:</b> |            |          |               | <b>12646</b> | <b>100234</b> | <b>1.02</b>        | <b>0.08</b> |       | <b>57</b> | <b>0.03</b> |               |

**Supplementary Figure 2. WGS-derived IGV snapshots of two novel SVs.**

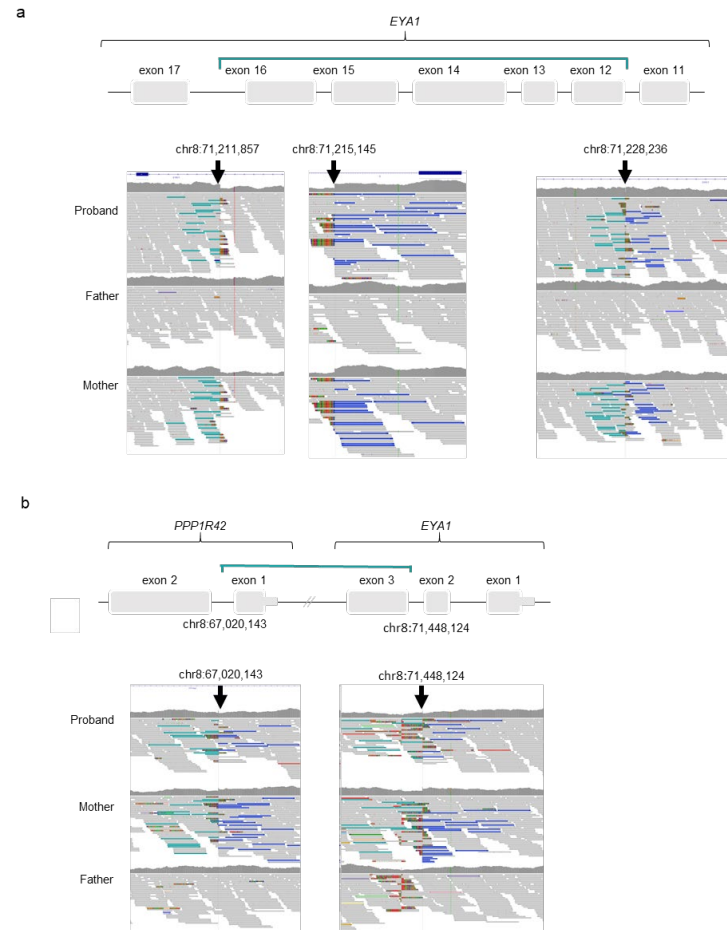

(a) CGRs (inversion with a deletion) where the junctions of three breakpoints were identified. The light green and blue lines show the joining of discordant reads for 3' to 3' and 5' to 5', respectively. (b) Cryptic large inversion where the junctions of two breakpoints were identified. The soft-clipped reads (light green and blue lines) exhibit a read pair overlaps with the inverted region.

**Supplementary Figure 3. Identification of two neo-junctional reads with microhomology.**

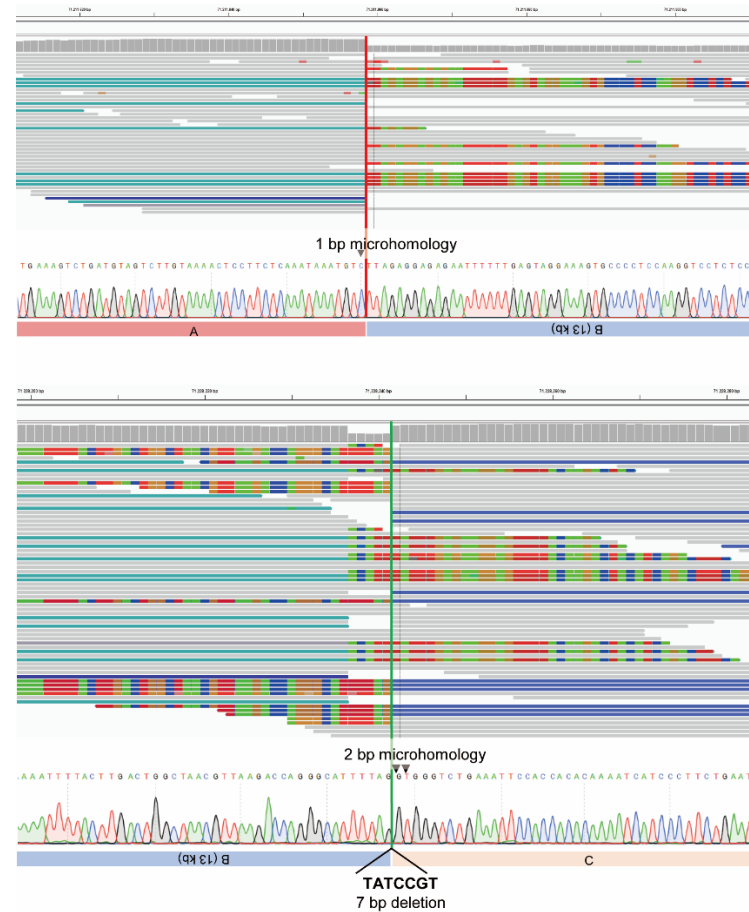

Two neo-junctional reads were validated with Sanger sequencing: one exhibiting 1 base pair (bp) of microhomology (junction A-B, position g.71215145) and the other showing 2 bp of microhomology (junction B-C, position g.71228236).

**Supplementary Table 1. List of primers employed to verify the locations of breakpoint junctions**

| <b>Sample</b>   | <b>Target</b> | <b>Primer Name</b> | <b>Primer sequence (5'-3')</b>  |
|-----------------|---------------|--------------------|---------------------------------|
| EYA1 wild-type  | A-B           | EYA1_F1            | GTT CTA GCA AGA AAA CGC A       |
| EYA1 wild-type  | A-B           | EYA1_R1            | ACA AGA ATA ATT TAA CCA ATT TGC |
| EYA1 wild-type  | B-C           | EYA1_F2            | TAG AGT TGT TTC ATT TCT AC      |
| EYA1 wild-type  | B-C           | EYA1_R2            | ACT GGA TTT AGA CGT AAG AG      |
| EYA1 complex SV | A-B inv       | MUT-AB-F           | CCA CTT GGG TTG TAT GTG CC      |
| EYA1 complex SV | A-B inv       | MUT-AB-R           | GCC ATT ACA TGT CTA TAG ATT CA  |
| EYA1 complex SV | B inv-C       | MUT-BC-F           | ACC AAT TTG CAA AAC TGG A       |
| EYA1 complex SV | B inv-C       | MUT-BC-R           | CAT AGT GCA GTT CAC AC          |

**Supplementary Table 2. List of primers employed to verify the locations of breakpoint junctions**

| <b>Sample</b> | <b>Target</b> | <b>Primer Name</b> | <b>Primer sequence (5'-3')</b> |
|---------------|---------------|--------------------|--------------------------------|
| SNUH          | A-B           | 67,020,143_WT_F    | TCAGAACACATGGTGTGAAAACCT       |
| SNUH          | A-B           | 67,020,143_WT_R    | TGGATTATGTTGCCTCTTTGTGG        |
| SNUH          | B-C           | 71,448,124_WT_F    | TCAGGATGGAGGTTGCTGAA           |
| SNUH          | B-C           | 71,448,124_WT_R    | GCGAGAAGTCCTATTGTGCAT          |
| SNUH          | A-B inv       | 67,020,143_Mut_F   | GTCTCTTGGCTCCTTTTCCCA          |
| SNUH          | A-B inv       | 67,020,143_Mut_R   | TGAAGGTTGGGATGGCTGTG           |
| SNUH          | B inv-C       | 71,448,124_Mut_F   | TGGATTATGTTGCCTCTTTGTGG        |
| SNUH          | B inv-C       | 71,448,124_Mut_R   | TGCGAGAAGTCCTATTGTGC           |

**Supplementary Table 3. List of primers employed to verify the locations of breakpoint junctions**

| <b>Sample</b> | <b>Target</b> | <b>Primer Name</b> | <b>Primer sequence (5'-3')</b> |
|---------------|---------------|--------------------|--------------------------------|
| WT            | A-B           | EYA1_C_F           | ACGCCAACAGATATGGGAGG           |
| Mut           |               |                    |                                |
| T1/T2 edited  |               | EYA1_B_R           | TGTAGCGGAAGGCCAACTTT           |
| T1/T3 edited  |               |                    |                                |

**Supplementary Table 4. In-house database of BOR/BO syndrome caused by *EYA1* variants**

| Sex/Age | Gene        | Variant                             | Branchial anomalies | Preauricular pits | Hearing loss (Type) | Renal anomalies | External | Middle | Inner | EVA | Typical vs. Atypical <sup>a</sup> |
|---------|-------------|-------------------------------------|---------------------|-------------------|---------------------|-----------------|----------|--------|-------|-----|-----------------------------------|
| F/16-20 | <i>EYA1</i> | c.1319G>A;p.Arg440Gln               |                     |                   |                     |                 |          |        |       |     | Typical                           |
| M/16-20 | <i>EYA1</i> | c.1220G>A;p.Arg407Gln               |                     |                   |                     |                 |          |        |       |     | Typical                           |
| F/6-10  | <i>EYA1</i> | c.1081C>T;p.Arg361Ter               |                     |                   |                     |                 |          |        |       |     | Typical                           |
| M/6-10  | <i>EYA1</i> | c.1081C>T;p.Arg361Ter               |                     |                   |                     |                 |          |        |       |     | Typical                           |
| M/6-10  | <i>EYA1</i> | c.1276G>A;p.Gly426Ser               |                     |                   |                     |                 |          |        |       |     | Atypical                          |
| M/6-10  | <i>EYA1</i> | c.1276G>A;p.Gly426Ser               |                     |                   |                     |                 |          |        |       |     | Atypical                          |
| F/11-15 | <i>EYA1</i> | Deletion                            |                     |                   |                     |                 |          |        |       |     | Typical                           |
| M/6-10  | <i>EYA1</i> | c.1081C>T;p.Arg361Ter               |                     |                   |                     |                 |          |        |       |     | Typical                           |
| F/21-25 | <i>EYA1</i> | Inversion reciprocal with deletion  |                     |                   |                     |                 |          |        |       |     | Typical                           |
| F/51-55 | <i>EYA1</i> | Inversion reciprocal with deletion  |                     |                   |                     |                 |          |        |       |     | Atypical                          |
| F/26-30 | <i>EYA1</i> | Inversion reciprocal with deletion  |                     |                   |                     |                 |          |        |       |     | Typical                           |
| M/31-35 | <i>EYA1</i> | Inversion reciprocal with deletion  |                     |                   |                     |                 |          |        |       |     | Typical                           |
| M/31-35 | <i>EYA1</i> | c.1623_1626dup;p.Gln543AsnfsTer90   |                     |                   |                     |                 |          |        |       |     | Typical                           |
| M/21-25 | <i>EYA1</i> | c.1360G>T;p.Gly454Cys               |                     |                   |                     |                 |          |        |       |     | Typical                           |
| F/6-10  | <i>EYA1</i> | c.1117_1118delCA;p.His373PhefsTer4  |                     |                   |                     |                 |          |        |       |     | Typical                           |
| F/0-5   | <i>EYA1</i> | <i>EYA1</i> large genomic inversion |                     |                   |                     |                 |          |        |       |     | Typical                           |
| M/41-45 | <i>EYA1</i> | <i>EYA1</i> large genomic inversion |                     |                   |                     |                 |          |        |       |     | Typical                           |

*EYA1*, canonical transcript NM\_000503.6

Abbreviations: F, female; M, male; SNHL, sensorineural hearing loss; MHL, mixed hearing loss; EVA, enlarged vestibular aqueducts; N/A, not available.

<sup>a</sup>Note, if the note doesn't satisfy the standard criteria for BOR/BO syndrome (at least three major criteria or two major and two minor criteria), it can be classified as atypical BOR/BO syndrome



**Supplementary Table 5. Disease-causing *EYA1* variants associated with BOR/BO syndrome (pathogenic or likely pathogenic in ClinVar database)**

| No | Genomic Position<br>(GRCh37/hg19) | HGVS                               |                                | Location<br>(Exon/Domain)                 | ClinVar                      | Molecular<br>Consequence |
|----|-----------------------------------|------------------------------------|--------------------------------|-------------------------------------------|------------------------------|--------------------------|
|    |                                   | Nucleotide                         | Protein                        |                                           |                              |                          |
| 1  | Chr8:72234477-G-A                 | c.229C>T                           | p.Arg77Ter                     | Exon 5 /<br>Region:Disordered<br>(1 - 95) | Pathogenic<br>(PMID18220287) | Nonsense                 |
| 2  | Chr8:72234032-G-A                 | c.355C>T                           | p.Gln119Ter                    | Exon 6 / Absent                           | Pathogenic<br>(PMID18220287) | Nonsense                 |
| 3  | Chr8:72233981-<br>TGCCGTACG-T     | c.398_405del                       | p.Pro133HisfsTer14             | Exon 6 / Absent                           | Pathogenic<br>(PMID9359046)  | Frameshift               |
| 4  | Chr8:72233985-G-C                 | c.402C>G                           | p.Tyr134Ter                    | Exon 6 / Absent                           | Pathogenic<br>(PMID21280147) | Nonsense                 |
| 5  | Chr8:72229877-G-A                 | c.466C>T                           | p.Gln156Ter                    | Exon 7 / Absent                           | Pathogenic<br>(PMID22447252) | Nonsense                 |
| 6  | Chr8:72229853-G-GA                | c.489dup                           | p.Leu164SerfsTer24             | Exon 7 / Absent                           | Pathogenic<br>(PMID10991693) | Frameshift               |
| 7  | Chr8:72229852-A-AG                | c.490dup                           | p.Leu164ProfsTer24             | Exon 7 / Absent                           | Pathogenic<br>(PMID18220287) | Frameshift               |
| 8  | Chr8:7229810-GC-G                 | c.532del                           | p.Ala178HisfsTer63             | Exon 7 / Absent                           | Pathogenic<br>(PMID18220287) | Frameshift               |
| 9  | Chr8:72211317-72226125            | g.(?_72211317)_(72226125_?<br>)del | g.(?_72211317)_(72226125_?)del | Intron 7                                  | Pathogenic<br>(PMID21280147) | SV                       |
| 10 | Chr8:72211910-G-C                 | c.602C>G                           | p.Ser201Ter                    | Exon 8 / Absent                           | Pathogenic<br>(PMID18220287) | Nonsense                 |
| 11 | Chr8:72211875-G-A                 | c.637C>T                           | p.Gln213Ter                    | Exon 8 / Absent                           | Pathogenic<br>(PMID18220287) | Nonsense                 |
| 12 | Chr8:72211872-C-T                 | c.639+1G>A                         | p.?                            | Intron 8                                  | Pathogenic<br>(PMID18220287) | Splicing                 |
| 13 | Chr8:72211454-A-C                 | c.654T>G                           | p.Tyr218Ter                    | Exon 9 / Absent                           | Pathogenic<br>(PMID19206155) | Nonsense                 |

|    |                        |                                        |                                        |                                               |                                     |            |
|----|------------------------|----------------------------------------|----------------------------------------|-----------------------------------------------|-------------------------------------|------------|
| 14 | Chr8:72211410-72211483 | c.640-15_698del                        | p.?                                    | Exon 9 / Absent                               | Pathogenic<br>(PMID18220287)        | Splicing   |
| 15 | Chr8:72211430-G-C      | c.678C>G                               | p.Tyr226Ter                            | Exon 9 / Absent                               | Pathogenic<br>(PMID18220287)        | Nonsense   |
| 16 | Chr8:72211333-G-A      | c.775C>T                               | p.Gln259Ter                            | Exon 9 /<br>Region:Disordered<br>(240 - 320)  | Pathogenic<br>(PMID18220287)        | Nonsense   |
| 17 | Chr8:72211325CG-C      | c.782del                               | p.Pro261ArgfsTer105                    | Exon 9 /<br>Region:Disordered<br>(240 - 320)  | Pathogenic<br>(PMID18220287)        | Frameshift |
| 18 | Chr8:72211301-TG-T     | c.806del                               | p.Ala269fsTer97                        | Exon 9 /<br>Region:Disordered<br>(240 - 320)  | Pathogenic<br>(PMID18220287)        | Frameshift |
| 19 | Chr8:72211281-C-T      | c.826+1G>A                             | p.?                                    | Intron 9                                      | Likely Pathogenic<br>(PMID18220287) | Splicing   |
| 20 | Chr8:72156818-72234523 | g.(?_72156818)_<br>(72234523_?)<br>del | g.(?_72156818)_<br>(72234523_?)<br>del | Intron 9                                      | Pathogenic<br>(PMID18220287)        | SV         |
| 21 | Chr8:72111555-72268741 | g.(?_72111555)_<br>(72268741_?)<br>del | g.(?_72111555)_<br>(72268741_?)<br>del | Intron 9                                      | Pathogenic<br>(PMID18220287)        | SV         |
| 22 | Chr8:72111499-72268758 | g.(?_72111499)_<br>(72268758_?)<br>del | g.(?_72111499)_<br>(72268758_?)<br>del | Intron 9                                      | Pathogenic<br>(PMID25135225)        | SV         |
| 23 | Chr8:72111575-72267140 | g.(?_72111575)_<br>(72267140_?)<br>del | g.(?_72111575)_<br>(72267140_?)<br>del | Intron 9                                      | Pathogenic<br>(PMID31427586)        | SV         |
| 24 | Chr8:72184079-G-A      | c.880C>T                               | p.Arg294Ter                            | Exon 10 /<br>Region:Disordered<br>(240 - 320) | Pathogenic<br>(PMID35982127)        | Nonsense   |
| 25 | Chr8:72184070-G-A      | c.889C>T                               | p.Arg297Ter                            | Exon 10 /<br>Region:Disordered<br>(240 - 320) | Pathogenic<br>(PMID18220287)        | Nonsense   |
| 26 | Chr8:72184037-G-A      | c.922C>T                               | p.Arg308Ter                            | Exon 10 /<br>Region:Disordered<br>(240 - 320) | Pathogenic<br>(PMID29500469)        | Nonsense   |
| 27 | Chr8:72184029-GT-G     | c.929del                               | p.Asn310ThrfsTer56                     | Exon 10 /<br>Region:Disordered<br>(240 - 320) | Pathogenic<br>(PMID33532864)        | Frameshift |

|           |                        |                                    |                                |                                               |                                     |            |
|-----------|------------------------|------------------------------------|--------------------------------|-----------------------------------------------|-------------------------------------|------------|
| <b>28</b> | Chr8:72184009-TG-T     | c.950del                           | p.Pro317GlnfsTer49             | Exon 10 /<br>Region:Disordered<br>(240 - 320) | Pathogenic<br>(PMID18220287)        | Frameshift |
| <b>29</b> | Chr8:72183992-C-G      | c.966+1G>C                         | p.?                            | Intron 10                                     | Likely Pathogenic<br>(PMID30655312) | Splicing   |
| <b>30</b> | Chr8:72183988-C-T      | c.966+5G>A                         | p.?                            | Intron 10                                     | Pathogenic<br>(PMID27657687)        | Splicing   |
| <b>31</b> | Chr8:72181955-72184152 | g.(?_72181955)_(72184152_?)<br>del | g.(?_72181955)_(72184152_?)del | Intron 10                                     | Pathogenic<br>(PMID18220287)        | SV         |
| <b>32</b> | Chr8:72182051-A-AAC    | c.972_973dup                       | p.Phe325CysfsTer42             | Exon 11 / Absent                              | Pathogenic<br>(PMID9359046)         | Frameshift |
| <b>33</b> | Chr8:72181955-72182078 | g.(?_72181955)_(72182078_?)<br>del | g.(?_72181955)_(72182078_?)del | Exon 11 / Absent                              | Pathogenic<br>(PMID19206155)        | SV         |
| <b>34</b> | Chr8:72182008-CAAGG-C  | c.1013_1016del                     | p.Ser338CysfsTer27             | Exon 11 / Absent                              | Pathogenic<br>(PMID18220287)        | Frameshift |
| <b>35</b> | Chr8:72181981-A-C      | c.1044T>G                          | p.Tyr348Ter                    | Exon 11 / Absent                              | Pathogenic<br>(PMID18220287)        | Nonsense   |
| <b>36</b> | Chr8:72181974-C-A      | c.1050+1G>T                        | p.?                            | Intron 11                                     | Pathogenic<br>(PMID18220287)        | Splicing   |
| <b>37</b> | Chr8:72181971-T-C      | c.1050+4A>G                        | p.?                            | Intron 11                                     | Pathogenic<br>(PMID17576681)        | Splicing   |
| <b>38</b> | Chr8:72111575-72246429 | g.(?_72111575)_(72246429_?)<br>del | g.(?_72111575)_(72246429_?)del | Intron 11                                     | Pathogenic<br>(PMID28832562)        | SV         |
| <b>39</b> | Chr8:72156929-T-C      | c.1051-2A>G                        | p.?                            | Intron 11                                     | Pathogenic<br>(PMID21280147)        | Splicing   |
| <b>40</b> | Chr8:72156897-G-A      | c.1081C>T                          | p.Arg361Ter                    | Exon 12 / Absent                              | Pathogenic<br>(PMID26969326)        | Nonsense   |
| <b>41</b> | Chr8:72156893-AT-A     | c.1084del                          | p.Met362TrpfsTer4              | Exon 12 / Absent                              | Pathogenic<br>(PMID18220287)        | Frameshift |
| <b>42</b> | Chr8:72156891-C-T      | c.1087G>A                          | p.Glu363Lys                    | Exon 12 / Absent                              | Pathogenic<br>(PMID10655545)        | Missense   |

|    |                        |                                |                                |                  |                                  |            |
|----|------------------------|--------------------------------|--------------------------------|------------------|----------------------------------|------------|
| 43 | Chr8:72156818-72156947 | g.(?_72156818)_(72156947_?)del | g.(?_72156818)_(72156947_?)del | Exon 12 / Absent | Pathogenic (PMID30937553)        | SV         |
| 44 | Chr8:72156837-C-A      | c.1140+1G>T                    | p.?                            | Intron 12        | Pathogenic (PMID23840632)        | Splicing   |
| 45 | Chr8:72129216-T-TA     | c.1182dup                      | p.Asn395Ter                    | Exon 13 / Absent | Pathogenic (PMID18220287)        | Nonsense   |
| 46 | Chr8:72129213-C-A      | c.1186G>T                      | p.Gly396Ter                    | Exon 13 / Absent | Pathogenic (PMID18220287)        | Nonsense   |
| 47 | Chr8:72129198-A-T      | c.1199+2T>A                    | p.?                            | Intron 13        | Likely Pathogenic (PMID18220287) | Splicing   |
| 48 | Chr8:72129088-C-T      | c.1200-1G>A                    | p.?                            | Intron 13        | Pathogenic (PMID18220287)        | Splicing   |
| 49 | Chr8:72129050-C-CT     | c.1236dup                      | p.Ala413SerfsTer5              | Exon 14 / Absent | Pathogenic (PMID18220287)        | Frameshift |
| 50 | Chr8:72129038-T-TA     | c.1248dup                      | p.Asn417Ter                    | Exon 14 / Absent | Pathogenic (PMID18220287)        | Nonsense   |
| 51 | Chr8:72129014-G-GT     | c.1272dup                      | p.Arg425ThrfsTer27             | Exon 14 / Absent | Pathogenic (PMID18220287)        | Frameshift |
| 52 | Chr8:72128978-G-A      | c.1309C>T                      | p.Arg437Cys                    | Exon 14 / Absent | Likely Pathogenic (PMID34031707) | Missense   |
| 53 | Chr8:72128972-CT-C     | c.1315del                      | p.Arg439AspfsTer3              | Exon 14 / Absent | Pathogenic (PMID18220287)        | Frameshift |
| 54 | Chr8:72128968-C-T      | c.1319G>A                      | p.Arg440Gln                    | Exon 14 / Absent | Pathogenic (PMID30655312)        | Missense   |
| 55 | Chr8:72128960-CTT-C    | c.1325_1326del                 | p.Lys442ArgfsTer9              | Exon 14 / Absent | Pathogenic (PMID19206155)        | Frameshift |
| 56 | Chr8:72128956-ATC-A    | c.1329_1330del                 | p.Glu443AspfsTer8              | Exon 14 / Absent | Pathogenic (PMID18220287)        | Frameshift |
| 57 | Chr8:72128937-A-GG     | c.1350delinsCC                 | p.Asn451GlnfsTer10             | Exon 14 / Absent | Pathogenic (PMID9020840)         | Frameshift |

|    |                          |                  |                    |                  |                                     |            |
|----|--------------------------|------------------|--------------------|------------------|-------------------------------------|------------|
| 58 | Chr8:72127965-T-C        | c.1361-2A>G      | p.?                | Intron 14        | Pathogenic<br>(PMID18220287)        | Splicing   |
| 59 | Chr8:72127964-C-T        | c.1361-1G>A      | p.?                | Intron 14        | Likely Pathogenic<br>(PMID18220287) | Splicing   |
| 60 | Chr8:72127916-C-A        | c.1408G>T        | p.Glu470Ter        | Exon 15 / Absent | Pathogenic<br>(PMID25741868)        | Nonsense   |
| 61 | Chr8:72127902-CAGGG-C    | c.1418_1421del   | p.Ala473GlyfsTer6  | Exon 15 / Absent | Pathogenic<br>(PMID18220287)        | Frameshift |
| 62 | Chr8:72127891-C-T        | c.1433G>A        | p.Trp478Ter        | Exon 15 / Absent | Pathogenic<br>(PMID18220287)        | Nonsense   |
| 63 | Chr8:72127865-A-G        | c.1459T>C        | p.Ser487Pro        | Exon 15 / Absent | Pathogenic<br>(PMID9361030)         | Missense   |
| 64 | Chr8:72127848-C-G        | c.1475+1G>C      | p.?                | Intron 15        | Pathogenic<br>(PMID23506628)        | Splicing   |
| 65 | Chr8:72127745-T-A        | c.1476-2A>T      | p.?                | Intron 15        | Pathogenic<br>(PMID21280147)        | Splicing   |
| 66 | Chr8:72127730-TCA-T      | c.1487_1488del   | p.Val496GlufsTer35 | Exon 16 / Absent | Pathogenic<br>(PMID18220287)        | Frameshift |
| 67 | Chr8:72127719-TACTA-T    | c.1496_1499del   | p.Leu499Ter        | Exon 16 / Absent | Pathogenic<br>(PMID35005812)        | Nonsense   |
| 68 | Chr8:72127711-GTAGTTGT-G | c.1501_1507del   | p.Thr501LeufsTer15 | Exon 16 / Absent | Pathogenic<br>(PMID15493068)        | Frameshift |
| 69 | Chr8:72127705-A-C        | c.1514T>G        | p.Leu505Arg        | Exon 16 / Absent | Pathogenic<br>(PMID9361030)         | Missense   |
| 70 | Chr8:72127674-A-T        | c.1545T>A        | p.Tyr515Ter        | Exon 16 / Absent | Pathogenic<br>(PMID18220287)        | Nonsense   |
| 71 | Chr8:72127648-T-TTA      | c.1570_1571insTA | p.Glu524ValfsTer10 | Exon 16 / Absent | Pathogenic<br>(PMID18220287)        | Frameshift |
| 72 | Chr8:72127640-A-T        | c.1579T>A        | p.Tys527Asn        | Exon 16 / Absent | Likely Pathogenic<br>(PMID23435380) | Missense   |

|           |                        |                                |                                |                  |                                     |            |
|-----------|------------------------|--------------------------------|--------------------------------|------------------|-------------------------------------|------------|
| <b>73</b> | Chr8:72127621-C-A      | c.1597+1G>T                    | p.?                            | Intron 16        | Likely Pathogenic<br>(PMID18220287) | Splicing   |
| <b>74</b> | Chr8:72123493-T-C      | c.1598-2A>G                    | p.?                            | Intron 16        | Pathogenic<br>(PMID23840632)        | Splicing   |
| <b>75</b> | Chr8:72123492-C-G      | c.1598-1G>C                    | p.?                            | Intron 16        | Pathogenic<br>(PMID18220287)        | Splicing   |
| <b>76</b> | Chr8:72123462-G-A      | c.1627C>T                      | p.Gln543Ter                    | Exon17 / Absent  | Pathogenic<br>(PMID34160378)        | Nonsense   |
| <b>77</b> | Chr8:72123450-T-C      | c.1639A>G                      | p.Arg547Gly                    | Exon17 / Absent  | Pathogenic<br>(PMID10655545)        | Missense   |
| <b>78</b> | Chr8:72123444-CT-C     | c.1644del                      | p.Val549TrpfsTer6              | Exon17 / Absent  | Pathogenic<br>(PMID18220287)        | Frameshift |
| <b>79</b> | Chr8:72123371-72123511 | g.(?_72123371)_(72123511_?)del | g.(?_72123371)_(72123511_?)del | Exon17 / Absent  | Pathogenic<br>(PMID29500469)        | SV         |
| <b>80</b> | Chr8:72109607-72123547 | c.(?_1598-56)_(*1968_?)del     | c.(?_1598-56)_(*1968_?)del     | Intron 17        | Pathogenic<br>(PMID23851940)        | SV         |
| <b>81</b> | Chr8-72111606-A-G      | c.1748T>C                      | p.Leu583Pro                    | Exon 18 / Absent | Likely Pathogenic<br>(PMID31049720) | Missense   |
